# Supplementary material
Source: PubMed Central journal article supplement (PMC7253343)
Supplement: NIHMS1570821-supplement-Updated_SI.pdf [file NIHMS1570821-supplement-Updated_SI.pdf]

## Supplementary Information for:

**Fluorine-18 labeled poly (ADP-ribose) polymerase1 inhibitor as a potential alternative to 2-deoxy-2-[<sup>18</sup>F]fluoro-D-glucose positron emission tomography in oral cancer imaging.**

Abbreviated title: [<sup>18</sup>F]PARPi imaging as a potential alternative to [<sup>18</sup>F]FDG PET/CT in oral cancer imaging.

Paula Demétrio De Souza França, MD<sup>a,b</sup>, Sheryl Roberts, PhD<sup>a</sup>, Susanne Kossatz, PhD<sup>a,1</sup>, Navjot Guru<sup>a</sup>, Christian Mason, PhD<sup>a</sup>, Daniella Karassawa Zanoni, MD<sup>b,2</sup>, Marcio Abrahão, MD, PhD<sup>b</sup>, Heiko Schöder, MD, MDA<sup>a</sup>, Ian Ganly, MD, PhD<sup>c,d</sup>, Snehal G. Patel, MD<sup>c,d,\*</sup>, Thomas Reiner, PhD<sup>a,d,e,\*</sup>

<sup>a</sup> Department of Radiology, Memorial Sloan Kettering Cancer Center, New York, NY, USA.

<sup>b</sup> Department of Otorhinolaryngology and Head and Neck Surgery, Federal University of São Paulo, SP, Brazil.

<sup>c</sup> Department of Surgery, Memorial Sloan Kettering Cancer Center, New York, NY, USA.

<sup>d</sup> Weill Cornell Medical College, New York, NY, USA.

<sup>e</sup> Chemical Biology Program, Memorial Sloan Kettering Cancer Center, New York, NY, USA.

<sup>1</sup> Additional affiliation: Department of Nuclear Medicine, School of Medicine, Technische Universität München, Munich, Germany.

<sup>2</sup> Additional affiliation: Department of Radiology, University of Iowa, IA, USA.

### **Correspondence addressed to:**

\**Snehal Patel* - 1275 York Avenue. New York, NY, 10065. [patels@mskcc.org](mailto:patels@mskcc.org); (P) 1-646-888-3461; (F) 917-432-2111

\**Thomas Reiner* - 1275 York Avenue. New York, NY, 10065. [reinert@mskcc.org](mailto:reinert@mskcc.org); (P) 1-646-888-3461; (F) 646 4220408

## General methods

All reactions were magnetically stirred, and room temperature refers to 20–25 °C. High performance liquid chromatography (HPLC) purification and analysis was performed on a Shimadzu UFLC HPLC system equipped with a DGU-20A degasser, an SPD-M20A UV detector, a LC-20AB pump system, and a CBM-20A communication BUS module. A LabLogic Scan-RAM radio-TLC/HPLC-detector was used for the radioactive signal. HPLC solvents (Buffer A: 0.1% TFA in water, Buffer B: 0.1% TFA in MeCN) were filtered before use. HPLC purification and analysis of PARPi-FL was performed on an analytical column reversed-phase Atlantis® T3 5 µm column (C18, 4.6 mm, and 250 mm). HPLC purification and analysis of [<sup>18</sup>F]PARPi was performed on a semi-preparative reversed-phase Phenomenex Gemini column (C6-Phenyl, 5 µm, 10 mm, and 250 mm). Purification and analysis of PARPi-FL was performed with Method A (flowrate: 1.0 mL min<sup>-1</sup>; gradient: 0–15 min 5%–95% B; 15–18 min 95% B; 18–18.3 min 95-5% B). Purification and analysis of [<sup>18</sup>F]PARPi was performed with Method B (flowrate: 5 mL min<sup>-1</sup>; isocratic: 0–45 min 30% B). All PET imaging experiments were conducted on a microPET INVEON camera equipped with a CT scanner (Siemens, Knoxville, TN). Digital phosphor autoradiography was obtained using a Typhoon FLA 7000 laser scanner from GE Healthcare (Port Washington, NY). A lyophilizer (FreeZone 2.5 Plus, Labconco, Kansas City, MO, USA) was used for freeze drying. An automated cell counter (Beckman Coulter, Vi-Cell viability analyzer) was used for counting the number of cells. Tissues were sectioned using a Avantik, QS11 cryotome (Belair, New Jersey, USA). *In vitro* fluorescence confocal microscopy on cells was carried out using a LSM880 Airyscan confocal microscope (Zeiss, Germany). QMA light ion-exchange cartridges and C-18 Sep-Pak light cartridges were obtained from Waters (Milford, MA).

## Chemicals

Commercially available compounds were used without further purification unless otherwise stated. 4,7,13,16,21,24-Hexaoxa-1,10-diazabicyclo[8.8.8]hexacosane (K<sub>222</sub>), extra-dry dimethyl sulfoxide (DMSO) over molecular sieves, Bio Ultra PEG 500, Ethyl 4-nitrobenzoate, potassium carbonate (K<sub>2</sub>CO<sub>3</sub>), triethylamine (NEt<sub>3</sub>), trifluoroacetic acid (TFA) and 4-Fluorobenzoic acid were purchased from Sigma-Aldrich (St. Louis, MO). [<sup>18</sup>F]FDG was obtained from the Memorial Sloan Kettering Cancer Center (MSK) Radiochemistry and Molecular Imaging Probes Core. HPLC and LC-MS grade acetonitrile (MeCN) were obtained from Fischer scientific (Hampton, NH). Water (> 18.2 MΩ cm<sup>-1</sup> at 25 °C) was obtained from an Alpha-Q Ultrapure water system

from Millipore (Bedford, MA). PARP-NH precursor (4-(4-fluoro-3-(piperazine-1-carbonyl)benzyl)phthalazin-1(2H)-one) was purchased from AA blocks (San Diego, CA) and purified by HPLC using Method A before use and further synthesis. BODIPY-FL NHS-ester was purchased from Invitrogen, Carlsbad, CA without further purification. PARPi-FL was kept as a 1.5 mM stock solution in BioUltra PEG300 and diluted to the final working concentration for the respective *in vitro* experiments with full cell medium.

### **PARPi-FL synthesis**

The synthesis of PARPi-FL was prepared according to our previously described procedures [1-3]. Briefly, fluorescent dye BODIPY-FL NHS-ester (1.0 equivalent) was conjugated to 4-(4-fluoro-3-(piperazine-1-carbonyl)benzyl) phthalazin-1(2H)-one (1.0 equivalent) under a base, Et<sub>3</sub>N (5.0 equivalent) in acetonitrile for 4 h at room temperature and purified by preparative HPLC (Atlantis® T3 5 µm column 4.6 × 250 mm, 1 mL/min, 5 to 95% of acetonitrile in 15 min) to afford PARPi-FL in 70–79% yield as a red solid. Analytical HPLC analysis (Waters' Atlantis T3 C18 5 µm 4.6 × 250 mm column) showed high purity (> 99%, t<sub>R</sub> = 13.9 min) of the imaging agent. The identity of PARPi-FL was confirmed using ESI-MS (MS(+)) *m/z* = 663.63 [M + Na]<sup>+</sup>.

### **[<sup>18</sup>F]PARPi radiosynthesis**

[<sup>18</sup>F]PARPi was synthesized using an optimized labeling procedure according to our previously described method [3-6]. Briefly, [<sup>18</sup>F] fluoride was obtained via the <sup>18</sup>O(p,n)<sup>18</sup>F nuclear reaction of 16.5-MeV protons in a GE Healthcare PET Trace 800 using enriched <sup>18</sup>O-water. A QMA cartridge containing cyclotron-produced [<sup>18</sup>F]fluoride (50 mCi, 2.22 GBq) was eluted with a 2 mL solution of K<sub>222</sub>/K<sub>2</sub>CO<sub>3</sub> (Kryptofix [2.2.2] (4,7,13,16,21,24-hexaoxa-1,10-diazabicyclo [8.8.8]hexacosane, (22.5 mg)), 0.02 mL 5 M K<sub>2</sub>CO<sub>3</sub> and 4% MeCN in H<sub>2</sub>O in V<sub>total</sub> = 5 mL). Solvents were removed azeotropically at 120 °C under N<sub>2</sub>. Afterwards, 500 µg of ethyl-4-nitrobenzoate in 100 µL of dry DMSO was added and the mixture heated to 150 °C for 15 min. 50 µL of 1M NaOH was added followed by 50 µL of 1M HCl. Then, 2 mg of 4-(4-fluoro-3-(piperazine-1-carbonyl)benzyl) phthalazin-1(2H)-one in dry DMSO 100 µL was added followed by 10 mg of HBTU dissolved in 100 µL of DMSO and 20 µL of Et<sub>3</sub>N. 400 µL of MeCN and 1 mL H<sub>2</sub>O was added to the mixture and the product purified by reverse phase Prep-HPLC (Method B, t<sub>R</sub> = 31.22 min) yielding (non-decay-corrected) 21% ± 3.0%. The radiochemical purity showed > 98% and the molar activity is 37,000 MBq/µmol (1.0 Ci/µmol).

### **Cell lines and cell culture**

FaDu and Cal 27 cell lines were purchased from ATCC, Manassas, VA. Cells were grown in a monolayer culture at 37 °C in a 5% CO<sub>2</sub> humidified atmosphere. FaDu cells were maintained in MEM and Cal 27 in D-MEM medium. Both media contained 10% (v/v) FBS and 1% PenStrep. Both cell lines tested negative for mycoplasma infection. Cell lines were tested for PARP1 expression and PARPi-FL uptake prior to xenografting.

### **PARPi-FL cell staining and confocal imaging**

To determine PARPi-FL uptake *in vitro*, we plated 250,000 cells of either FaDu or Cal 27 in different chambers of an 8-well chamber plate (Thermo Fisher Scientific, 06171480, USA). Cells were allowed to attach and grow for 24 hours. Cells were incubated with PARPi-FL (100 nM in 30% PEG300/PBS) for 5 minutes before being washed in PBS for 5 minutes. A solution with 10% Hoechst in PBS was added into each well for 5 more minutes and washed out with PBS for 5 minutes. PBS was again added, and the live cells were imaged, in an 8-well chamber, using a Confocal Microscope (LMS800, Zeiss, Germany). Images were acquired at 488 nm and 543 nm excitations wavelengths.

### **Western blot**

PARP1 protein expression was measured in FaDu and Cal 27 cell lysates using Western blot analysis as described in previous papers [7]. Briefly, proteins were isolated from cells and 20 µg of protein per sample were separated with SDS/PAGE gel electrophoresis and transferred to a nitrocellulose membrane. Proteins were detected using antibodies specific for PARP1 (1:1,000, Invitrogen; PA5-16452) and β-actin (1:40,000; Cell Signaling Technology; 3700) with a corresponding horseradish peroxidase (HRP) conjugated secondary antibody (1:20,000, ab6721, Abcam, USA). Detection was performed using a chemiluminescent substrate (Thermo Scientific #34077, Super Signal West Pico, USA). The bands were visualized using an automated blot processing machine (Ewen-Parker X-Ray corporation, New York, USA) with a light sensitive clear blue x-ray film (Thermo Scientific, 24x30 cm, SB2324231, Belgium) with 30 seconds exposure time.

### **H&E staining of tissue sections**

After autoradiography, slides were fixed in 4% paraformaldehyde (PFA, MP Chemicals, Solon, OH) in sterile water for 10 minutes at 4 °C and kept for 10 minutes in 70% ethanol. The sections were stained with hematoxylin and eosin (H&E) by the MSK Molecular Cytology Core facility.

Slides were scanned (Mirax, 3DHISTECH, Budapest, Hungary) to allow for digital histological correlation with autoradiography data.

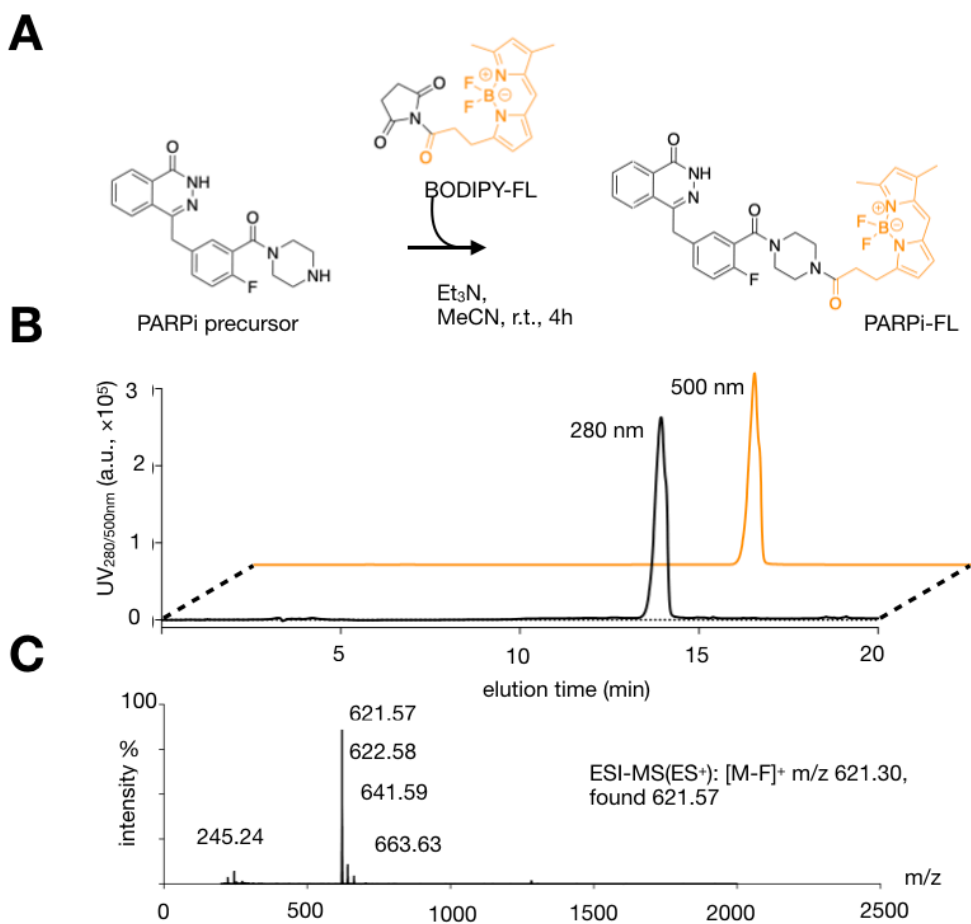

Supplementary Fig. 1. Chemical characterizations of PARPi-FL. (A) Scheme for the synthesis of PARPi-FL by conjugating PARPi precursor to BODIPY. *Reagents and conditions*: anhydrous MeCN, Et<sub>3</sub>N, 4 h, r.t., 70%. (B) HPLC spectra from 0–20 minutes at 280 nm (*black*) and 500 nm (*orange*) of PARPi-FL (> 99% purity). (C) ESI-MS chromatogram of PARPi-FL.

**A**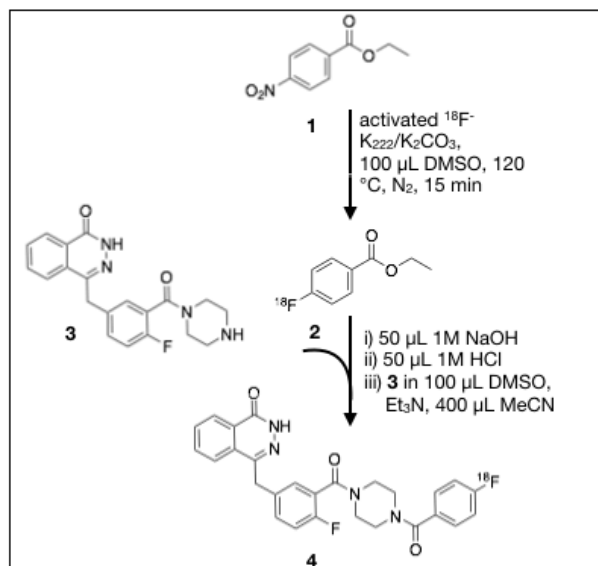**B**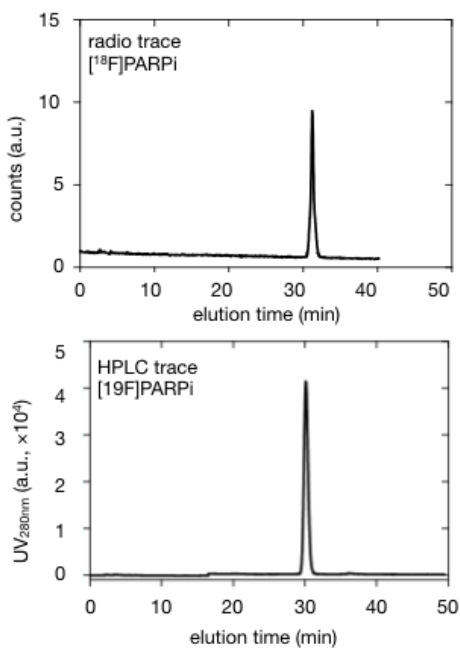

Supplementary Fig. 2. Chemical characterization of  $[^{18}\text{F}]$ PARPi. **(A)** Scheme for the two-step synthesis of  $[^{18}\text{F}]$ PARPi (compound **4**). *Reagents and conditions:* Reaction 1: ethyl 4-nitrobenzoate (compound **1**), activated  $\text{F}^-$ ,  $\text{K}_{222}/\text{K}_2\text{CO}_3$ , DMSO, 120  $^\circ\text{C}$ ,  $\text{N}_2$ , 15 min. Reaction 2: Compound **3**, 50  $\mu\text{L}$  1M NaOH, 50  $\mu\text{L}$  1M HCl, DMSO,  $\text{Et}_3\text{N}$ . **(B)** The radiotrace chromatogram (*top*) and HPLC trace at 280 nm (*bottom*) of  $[^{18}\text{F}]$ PARPi.

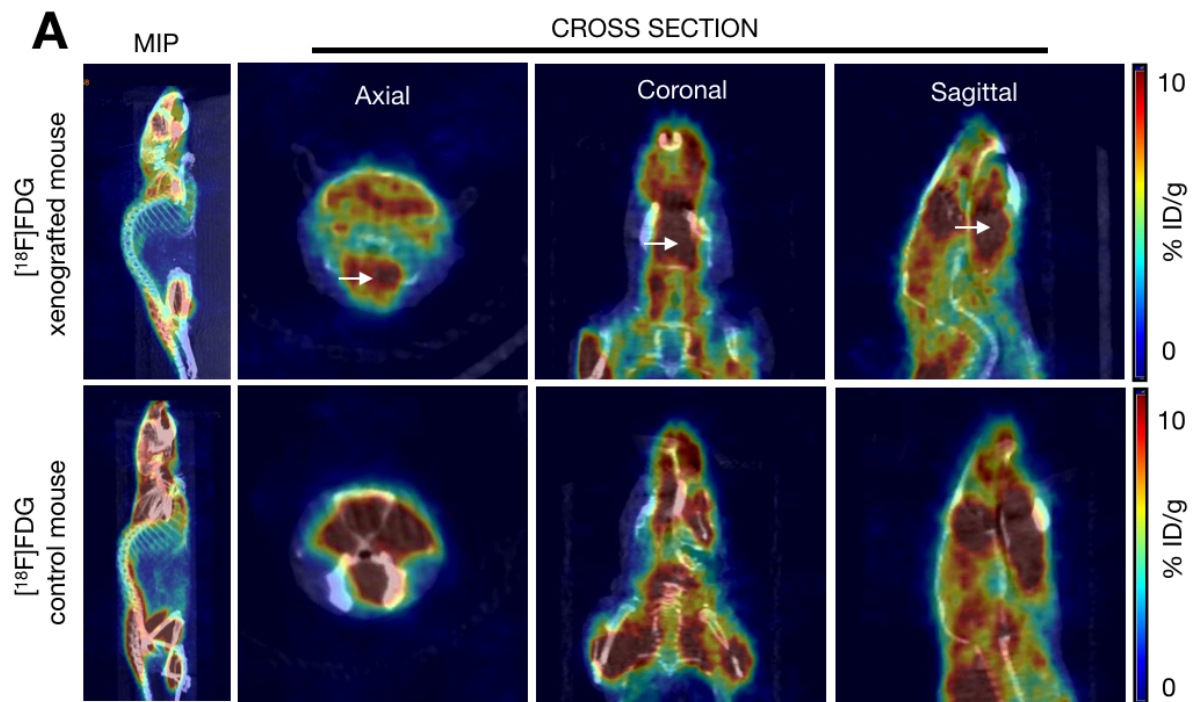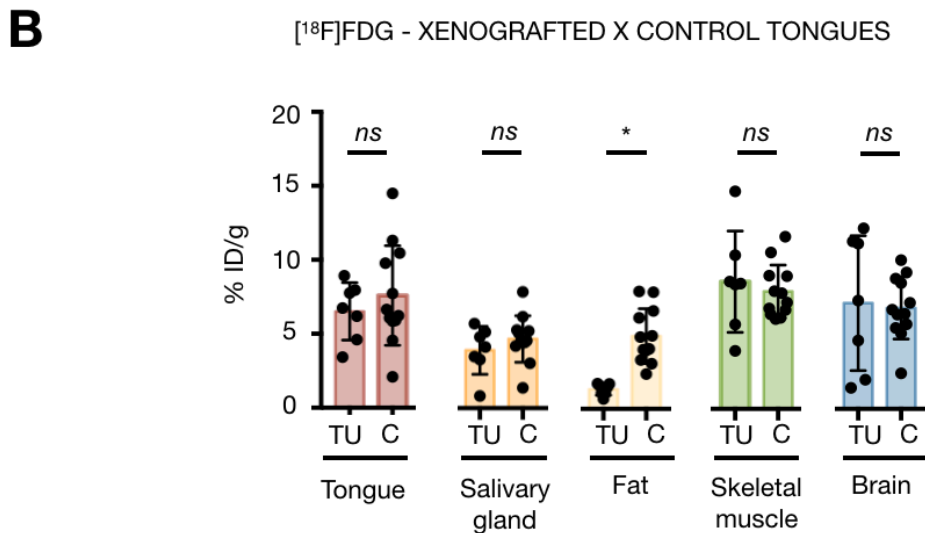

Supplementary Fig. 3. PET imaging with  $[^{18}\text{F}]\text{FDG}$ . Xenografted groups of animals were inoculated on the anterior 1/3 and ventral portion of the right-hand side of the tongue with 500,000 cancer cells in 20  $\mu\text{L}$  of PBS ( $n = 3$  FaDu,  $n = 4$  Cal 27), and tumors were allowed to proliferate for 4 weeks. Twelve healthy nude mice were used as controls. All animals were injected with an average of  $7.7 \pm 2.2$  MBq ( $208.1 \pm 59.4$   $\mu\text{Ci}$ ) of  $[^{18}\text{F}]\text{FDG}$  on Day 1 after tumor



establishment and imaged for 15 minutes on an INVEON small-animal micro-PET/CT scanner under isoflurane-induced anesthesia. **(A)** Representative images of the PET/CT scans taken from a tumor-bearing and a control mouse on Day 1. The top row: mouse with tongue orthotopic tumor, bottom row: healthy control mouse. Arrows point to the tumor. Images show similar uptake of [<sup>18</sup>F]FDG in both tumor-bearing and control mice. [<sup>18</sup>F]FDG scans showed high physiological uptake in the tongue, floor of mouth, and masticatory muscles. **(B)** Quantification of the tracer uptake in different organs from PET/CT images. Statistical analysis was performed using the Mann Whitney test in GraphPad Prism 7. Data points represent mean values, and error bars represent standard deviations. [<sup>18</sup>F]FDG quantification showed that the uptake in tumor was not significantly different from the other organs, except for fat (\*p < 0.05).



injected with an average of  $10.4 \pm 3$  MBq ( $282.2 \pm 80.6$   $\mu$ Ci) of [ $^{18}$ F]PARPi on Day 2 after tumor establishment and imaged on an INVEON small-animal micro-PET/CT scanner under isoflurane-induced anesthesia for 15 minutes. **(A)** Representative images of the PET/CT scans taken from a tumor-bearing and a control mouse on Day 2. The top row: mouse with tongue orthotopic tumor, bottom row: healthy control mouse. Arrows point to the tumor. Images show clear tumor delineation with [ $^{18}$ F]PARPi with almost no uptake in controls. **(B)** Quantification of the tracer uptake in different organs from PET/CT images. Statistical analysis was performed using the Mann Whitney test in GraphPad Prism 7. Data points represent mean values, and error bars represent standard deviations. [ $^{18}$ F]PARPi quantification showed that the uptake in tumor was significantly higher than all the other organs (\* $p > 0.05$ ).

## References

- [1] Reiner T, Lacy J, Keliher EJ, Yang KS, Ullal A, Kohler RH, et al. Imaging therapeutic PARP inhibition in vivo through bioorthogonally developed companion imaging agents. *Neoplasia (New York, N.Y.)* 2012;14:169-77.
- [2] Irwin CP, Portorreal Y, Brand C, Zhang Y, Desai P, Salinas B, et al. PARPi-FL--a fluorescent PARP1 inhibitor for glioblastoma imaging. *Neoplasia (New York, N.Y.)* 2014;16:432-40.
- [3] Carney B, Kossatz S, Lok BH, Schneeberger V, Gangangari KK, Pillarsetty NVK, et al. Target engagement imaging of PARP inhibitors in small-cell lung cancer. *Nature communications* 2018;9:176.
- [4] Carney B, Carlucci G, Salinas B, Di Gialleonardo V, Kossatz S, Vansteene A, et al. Non-invasive PET Imaging of PARP1 Expression in Glioblastoma Models. *Molecular imaging and biology : MIB : the official publication of the Academy of Molecular Imaging* 2016;18:386-92.
- [5] Kossatz S, Carney B, Schweitzer M, Carlucci G, Miloushev VZ, Maachani UB, et al. Biomarker-Based PET Imaging of Diffuse Intrinsic Pontine Glioma in Mouse Models. *Cancer research* 2017;77:2112-23.
- [6] Tang J, Salloum D, Carney B, Brand C, Kossatz S, Sadique A, et al. Targeted PET imaging strategy to differentiate malignant from inflamed lymph nodes in diffuse large B-cell lymphoma. *Proceedings of the National Academy of Sciences of the United States of America* 2017;114:E7441-e9.
- [7] Kossatz S, Carney B, Farley C, Weber WA, Drain CM, and Reiner T. Direct Imaging of Drug Distribution and Target Engagement of the PARP Inhibitor Rucaparib. *Journal of nuclear medicine : official publication, Society of Nuclear Medicine* 2018;59:1316-20.
